# Supplementary material for: A Feed-Forward Circuit of EndogenousPGC-1αandEstrogen Related Receptor αRegulates the Neuronal Electron Transport Chain
Source: Hindawi journal article supplement (doi:10.1155/2016/2405176), 2016-01-01
Supplement: f1 [file 2405176.f1.pdf]

## Supplementary Material

**Table 1: Primers used for qChIP**

| Gene product    | Forward primer        | Reverse primer       |
|-----------------|-----------------------|----------------------|
| <b>ATP5A1</b>   | CCCCGGTTATCAGGATTTTT  | CGGGGCAATCTGAATTTTTA |
| <b>COX5B</b>    | CTCAACTCCAGGGACCAAAA  | AGCTCTGCCTCTTTCTGCAC |
| <b>NDUFB5</b>   | TCCTACAAAGAAGGGCCAAA  | ATGAGGACAAAGGCAGGATG |
| <b>SDHB</b>     | AGGGACCCGGATAGGATG    | CTTCCCCCGTGACCTTCT   |
| <b>UCP2</b>     | GCAGGCCTTTGCATCTGTTCT | TAGCTTTTGCCTGAGCTCTG |
| <b>Negative</b> | TGCCAAAGCCTAGGGGAA    | ATGGTTGCCACTGGGGATC  |

### Figure Legends

**Figure S1.** (A) Quantitative PCR shows a dose-dependent reduction of *PGC-1 $\alpha$*  mRNA abundance after transfection with 50–150 nM *PGC-1 $\alpha$*  siRNA. (B) Transfection with 80 nM *PGC-1 $\alpha$*  siRNA levels is sufficient to reliably knock down *PGC-1 $\alpha$*  mRNA abundance to 20% of the abundance in cells transfected with negative control siRNA. (C) *PGC-1 $\alpha$*  protein levels are substantially reduced after transfection with 80 nM *PGC-1 $\alpha$*  siRNA by western blot analysis compared to negative control transfected and cells.

**Figure S2.** Transfection with  $ERR\alpha$  siRNA reduced the  $ERR\alpha$  mRNA abundance to 20% of the abundance in cells transfected with negative control siRNA (n=4).

**Figure S3.** VISTA plot of a 2kb region of the promoter showing percentage identity of the human and mouse sequences. Underlined sequence represents the ChIP primer location spanning a putative  $ERR\alpha$  binding site.

**Figure S4.** Dose response curve correlating pioglitazone at three concentrations and relative abundance of *PGC-1 $\alpha$*  mRNA.

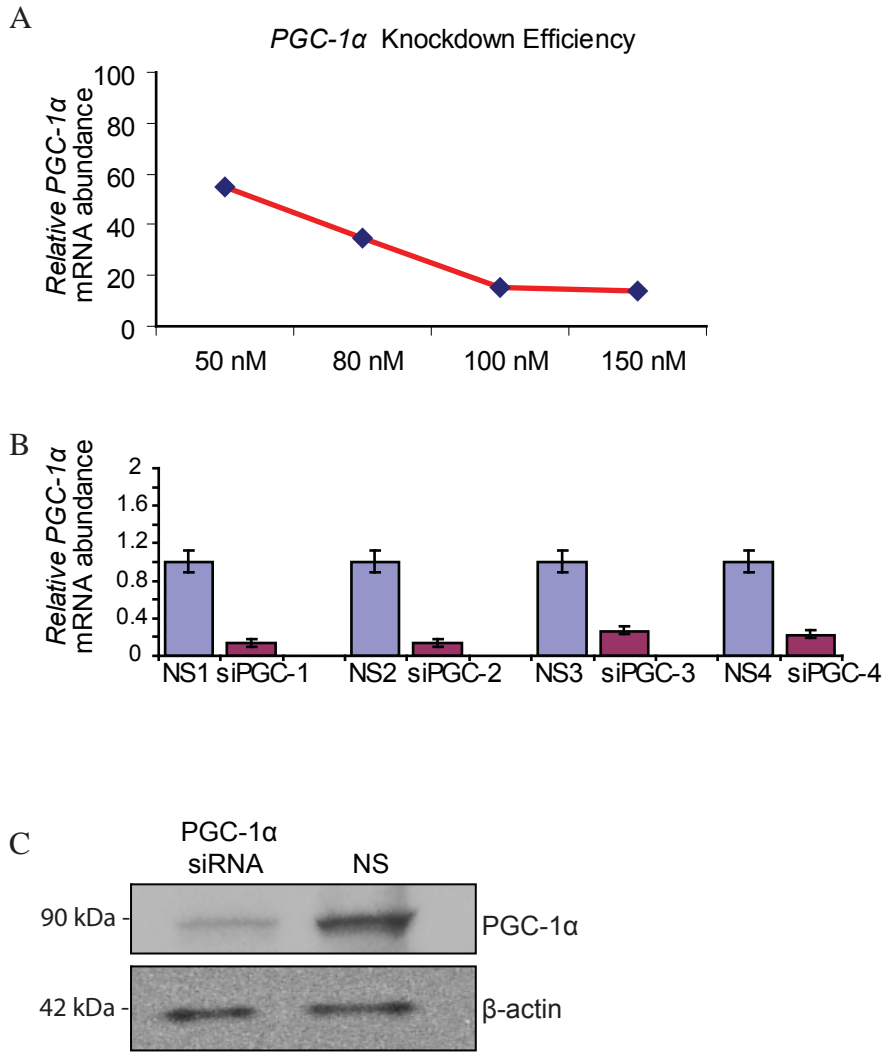

Figure S1

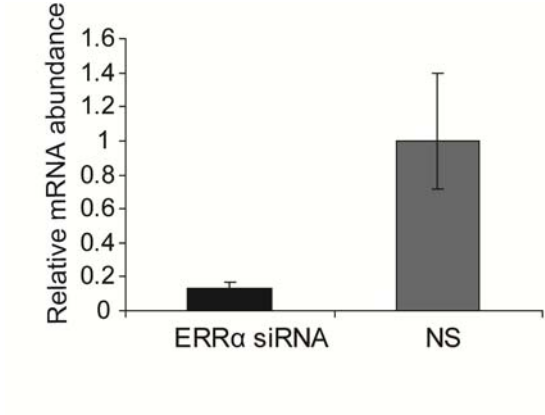

Figure S2

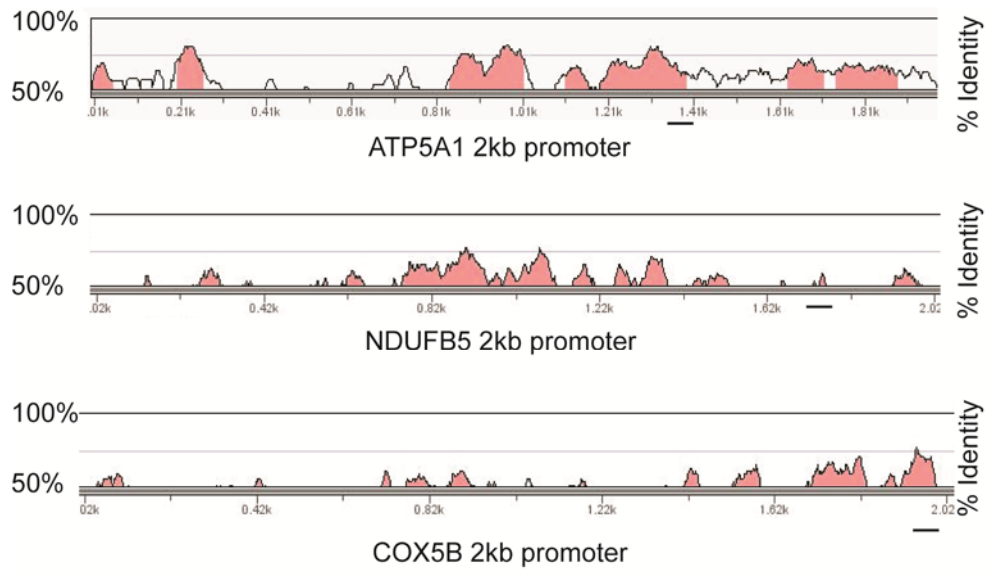

Figure S3

*PGC-1 $\alpha$*  mRNA expression

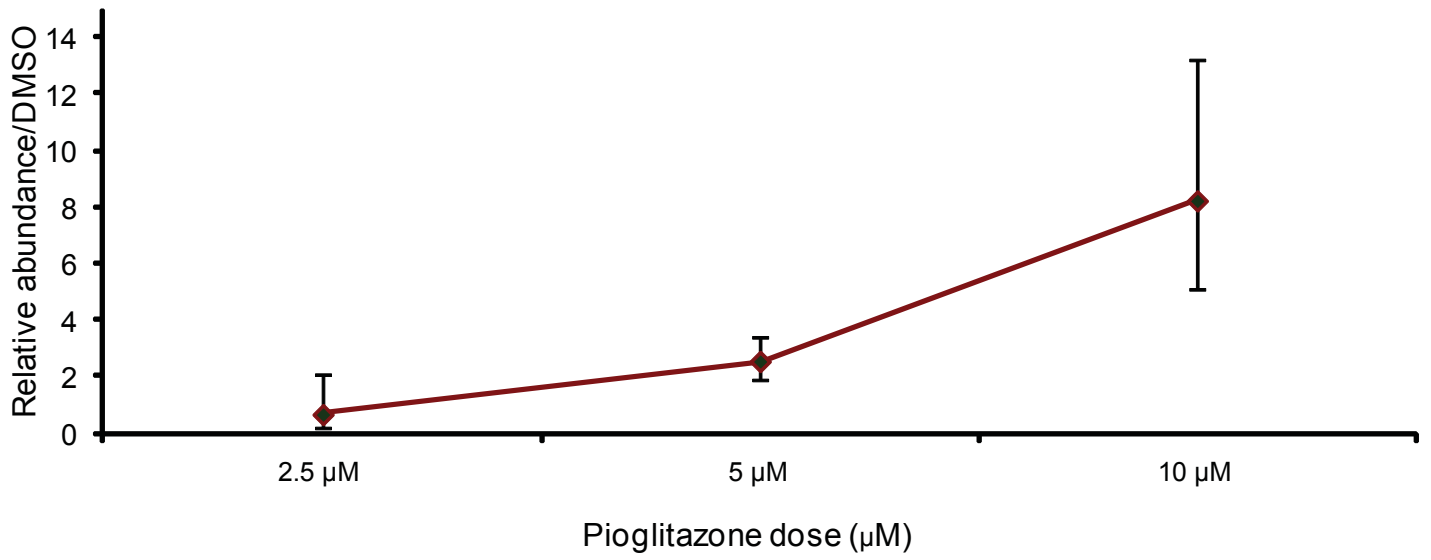

Figure S4
